# Supplementary material for: Arabidopsis thaliana NudiXes have RNA-decapping activity
Source: Royal Society of Chemistry journal article supplement (doi:10.1039/d2cb00213b), 2023-01-01
Supplement: d2cb00213b1.zip [file d2cb00213b1.zip]

## Sheet: AtNudt6
Search title	Kufel cal
MS data file	\\212.87.29.243\Dane\USERS\Agata\tmp\211234194kufe_Nudt6.mgf
Database 1	EColi (4,448 sequences; 1,358,110 residues)
Database 2	TAIR10 20101214 (35,386 sequences; 14,482,855 residues)
Taxonomy 1	(none)
Taxonomy 2	(none)
Timestamp	25 Nov 2022 at 15:16:43 GMT
Type of search	MS/MS Ion Search
Quantitation	None
Crosslinking	None
Enzyme	Trypsin
Fixed modifications	Methylthio (C)
Variable modifications	Oxidation (M)
Mass values	Monoisotopic
Protein mass	Unrestricted
Peptide mass tolerance	5 ppm
Fragment mass tolerance	0.01 Da
Max missed cleavages	1
Instrument type	HCD
Number of queries	48540
Significance threshold p<	0.05
Target FDR (overrides sig. threshold)	1
Target FDR type	psm
Max. number of families	AUTO
Ions score or expect cut-off	-1
Min. number of sig. unique sequences	2
Preferred taxonomy	All entries
Show Percolator scores?	no
Family	Member	Database	Accession	Score	Mass	Num. of matches	Num. of significant matches	Num. of sequences	Num. of significant sequences	emPAI	Description
1	1	TAIR10	AT2G04450.1	6163	32077	193	193	27	27	102	ATNUDT6, NUDX6, ATNUDX6, NUDT6 | nudix hydrolase homolog 6 | chr2:1543710-1545319 FORWARD LENGTH=283
2	1	EColi	sp|P0A6Y8|DNAK_ECOLI	42	69118	2	2	2	2	0.13	Chaperone protein DnaK OS=Escherichia coli (strain K12) OX=83333 GN=dnaK PE=1 SV=2

## Sheet: AtNudt7
Search title,"Kufel cal";
MS data file	\\212.87.29.243\Dane\USERS\Agata\tmp\211234195kufe_Nudt7.mgf;
Database 1,"EColi (4,448 sequences;" 1	358	110 residues)"""
Database 2,"TAIR10 20101214 (35,386 sequences;" 14	482	855 residues)"""
Taxonomy 1	(none);
Taxonomy 2	(none);
Timestamp,"25 Nov 2022 at 15:15:44 GMT";
Type of search,"MS/MS Ion Search";
Quantitation	None;
Crosslinking	None;
Enzyme	Trypsin;
Fixed modifications,"Methylthio (C)";
Variable modifications,"Oxidation (M)";
Mass values	Monoisotopic;
Protein mass	Unrestricted;
Peptide mass tolerance,"5 ppm";
Fragment mass tolerance,"0.01 Da";
Max missed cleavages	1;
Instrument type	HCD;
Number of queries,"52,097";
;
;
Significance threshold p<	0.05;
Target FDR (overrides sig. threshold)	1;
Target FDR type	psm;
Max. number of families	AUTO;
Ions score or expect cut-off	-1;
Min. number of sig. unique sequences	2;
Preferred taxonomy,"All entries";
Show Percolator scores?	no;
Family	Member	Database	Accession	Score	Mass	Num. of matches	Num. of significant matches	Num. of sequences	Num. of significant sequences	emPAI	Description
1	1	TAIR10	AT4G12720.1	3370	32048	127	127	17	17	12.68	"AtNUDT7, GFG1, NUDT7, ATNUDX7 | MutT/nudix family protein | chr4:7487716-7489557 FORWARD LENGTH=282"

## Sheet: AtNudt27
Search title,"Kufel cal";
MS data file	\\212.87.29.243\Dane\USERS\Agata\tmp\211234196kufe_Nudt19.mgf;
Database 1,"EColi (4,448 sequences;" 1	358	110 residues)"""
Database 2,"TAIR10 20101214 (35,386 sequences;" 14	482	855 residues)"""
Taxonomy 1	(none);
Taxonomy 2	(none);
Timestamp,"25 Nov 2022 at 15:15:50 GMT";
Type of search,"MS/MS Ion Search";
Quantitation	None;
Crosslinking	None;
Enzyme	Trypsin;
Fixed modifications,"Methylthio (C)";
Variable modifications,"Oxidation (M)";
Mass values	Monoisotopic;
Protein mass	Unrestricted;
Peptide mass tolerance,"5 ppm";
Fragment mass tolerance,"0.01 Da";
Max missed cleavages	1;
Instrument type	HCD;
Number of queries,"123,338";
;
;
Significance threshold p<	0.05;
Target FDR (overrides sig. threshold)	1;
Target FDR type	psm;
Max. number of families	AUTO;
Ions score or expect cut-off	-1;
Min. number of sig. unique sequences	2;
Preferred taxonomy,"All entries";
Family	Member	Database	Accession	Score	Mass	Num. of matches	Num. of significant matches	Num. of sequences	Num. of significant sequences	emPAI	Description
1	1	TAIR10	AT5G06340.1	26405	25985	1127	1127	18	18	24.29	"ATNUDX27, NUDX27 | nudix hydrolase homolog 27 | chr5:1936467-1937911 FORWARD LENGTH=227";
2	1	EColi	sp|P0AFG0|NUSG_ECOLI	3375	20518	95	95	11	11	16.26	"Transcription termination/antitermination protein NusG OS=Escherichia coli (strain K12) OX=83333 GN=nusG PE=1 SV=2";
3	1	EColi	sp|P0A9A9|FUR_ECOLI	3118	16968	67	67	9	9	13.8	"Ferric uptake regulation protein OS=Escherichia coli (strain K12) OX=83333 GN=fur PE=1 SV=1";
4	1	EColi	sp|P0A7L0|RL1_ECOLI	2333	24714	67	67	14	14	23.97	"50S ribosomal protein L1 OS=Escherichia coli (strain K12) OX=83333 GN=rplA PE=1 SV=2";
5	1	EColi	sp|P0A7G2|RBFA_ECOLI	1701	15145	51	51	9	9	26	"30S ribosome-binding factor OS=Escherichia coli (strain K12) OX=83333 GN=rbfA PE=1 SV=2;
6	1	EColi	sp|P0A7J7|RL11_ECOLI	1135	14912	29	29	6	6	8.3	"50S ribosomal protein L11 OS=Escherichia coli (strain K12) OX=83333 GN=rplK PE=1 SV=2;
7	1	EColi	sp|P02358|RS6_ECOLI	985	15694	59	59	9	9	23.13	"30S ribosomal protein S6 OS=Escherichia coli (strain K12) OX=83333 GN=rpsF PE=1 SV=1;
8	1	EColi	sp|P0A7R1|RL9_ECOLI	766	15759	35	35	13	13	29.72	"50S ribosomal protein L9 OS=Escherichia coli (strain K12) OX=83333 GN=rplI PE=1 SV=1;
9	1	EColi	sp|P36999|RLMA_ECOLI	601	30767	24	24	7	7	2.42	"23S rRNA (guanine(745)-N(1))-methyltransferase OS=Escherichia coli (strain K12) OX=83333 GN=rlmA PE=1 SV=1;
10	1	EColi	sp|P0A6Y8|DNAK_ECOLI	548	69118	26	26	16	16	1.67	"Chaperone protein DnaK OS=Escherichia coli (strain K12) OX=83333 GN=dnaK PE=1 SV=2;
11	1	EColi	sp|P0AA16|OMPR_ECOLI	527	27382	32	32	8	8	3.63	"DNA-binding dual transcriptional regulator OmpR OS=Escherichia coli (strain K12) OX=83333 GN=ompR PE=1 SV=1;
12	1	EColi	sp|P0A6D7|AROK_ECOLI	520	19526	14	14	6	6	2.6	"Shikimate kinase 1 OS=Escherichia coli (strain K12) OX=83333 GN=aroK PE=1 SV=2;
13	1	EColi	sp|P0AFD1|NUOE_ECOLI	481	18808	17	17	6	6	3.74	"NADH-quinone oxidoreductase subunit E OS=Escherichia coli (strain K12) OX=83333 GN=nuoE PE=1 SV=1;
14	1	EColi	sp|P63020|NFUA_ECOLI	470	21168	17	17	5	5	2.26	"Fe/S biogenesis protein NfuA OS=Escherichia coli (strain K12) OX=83333 GN=nfuA PE=1 SV=1;
15	1	EColi	sp|P0ACJ8|CRP_ECOLI	361	23763	18	18	5	5	1.88	"cAMP-activated global transcriptional regulator CRP OS=Escherichia coli (strain K12) OX=83333 GN=crp PE=1 SV=1;
16	1	EColi	sp|P0AF28|NARL_ECOLI	388	23912	15	15	7	7	2.42	"Nitrate/nitrite response regulator protein NarL OS=Escherichia coli (strain K12) OX=83333 GN=narL PE=1 SV=1";
17	1	EColi	sp|P69441|KAD_ECOLI	271	23617	10	10	6	6	2.46	"Adenylate kinase OS=Escherichia coli (strain K12) OX=83333 GN=adk PE=1 SV=1";
18	1	EColi	sp|P60438|RL3_ECOLI	261	22230	9	9	3	3	0.76	"50S ribosomal protein L3 OS=Escherichia coli (strain K12) OX=83333 GN=rplC PE=1 SV=1";
19	1	EColi	sp|P0AAC8|ISCA_ECOLI	242	11687	8	8	3	3	1.88	"Iron-binding protein IscA OS=Escherichia coli (strain K12) OX=83333 GN=iscA PE=1 SV=1";
20	1	EColi	sp|P0AG55|RL6_ECOLI	238	18938	12	12	8	8	4.8	"50S ribosomal protein L6 OS=Escherichia coli (strain K12) OX=83333 GN=rplF PE=1 SV=2";
21	1	EColi	sp|P0ACE7|HINT_ECOLI	233	13233	5	5	2	2	0.87	"Purine nucleoside phosphoramidase OS=Escherichia coli (strain K12) OX=83333 GN=hinT PE=1 SV=1";
22	1	EColi	sp|P31802|NARP_ECOLI	222	23560	5	5	5	5	1.44	"Nitrate/nitrite response regulator protein NarP OS=Escherichia coli (strain K12) OX=83333 GN=narP PE=3 SV=1";
23	1	EColi	sp|P0A7V0|RS2_ECOLI	195	26773	10	10	4	4	1.19	"30S ribosomal protein S2 OS=Escherichia coli (strain K12) OX=83333 GN=rpsB PE=1 SV=2";
24	1	EColi	sp|P69783|PTGA_ECOLI	191	18240	4	4	3	3	0.99	"PTS system glucose-specific EIIA component OS=Escherichia coli (strain K12) OX=83333 GN=crr PE=1 SV=2";
25	1	EColi	sp|P0AD24|YEJL_ECOLI	185	8283	5	5	2	2	1.65	"UPF0352 protein YejL OS=Escherichia coli (strain K12) OX=83333 GN=yejL PE=1 SV=1";
26	1	EColi	sp|P0A9Q1|ARCA_ECOLI	184	27367	7	7	3	3	0.85	"Aerobic respiration control protein ArcA OS=Escherichia coli (strain K12) OX=83333 GN=arcA PE=1 SV=1";
27	1	EColi	sp|P0A7W7|RS8_ECOLI	168	26296	10	10	4	4	1.22	"Transcriptional regulatory protein CpxR OS=Escherichia coli (strain K12) OX=83333 GN=cpxR PE=1 SV=1";
28	1	EColi	sp|P0A7W7|RS8_ECOLI	161	14164	5	5	3	3	3.29	"30S ribosomal protein S8 OS=Escherichia coli (strain K12) OX=83333 GN=rpsH PE=1 SV=2";
29	1	EColi	sp|P45578|LUXS_ECOLI	140	19542	6	6	2	2	0.53	"S-ribosylhomocysteine lyase OS=Escherichia coli (strain K12) OX=83333 GN=luxS PE=1 SV=3";
30	1	EColi	sp|P0ACF0|DBHA_ECOLI	124	9529	6	6	4	4	4.54	"DNA-binding protein HU-alpha OS=Escherichia coli (strain K12) OX=83333 GN=hupA PE=1 SV=1";
31	1	EColi	sp|P0ACD4|ISCU_ECOLI	122	13978	4	4	2	2	0.81	"Iron-sulfur cluster assembly scaffold protein IscU OS=Escherichia coli (strain K12) OX=83333 GN=iscU PE=1 SV=1";
32	1	EColi	sp|P0A9K9|SLYD_ECOLI	112	21116	6	6	2	2	0.49	"FKBP-type peptidyl-prolyl cis-trans isomerase SlyD OS=Escherichia coli (strain K12) OX=83333 GN=slyD PE=1 SV=1";
33	1	EColi	sp|P0A7K2|RL7_ECOLI	107	12288	4	4	2	2	0.95	"50S ribosomal protein L7/L12 OS=Escherichia coli (strain K12) OX=83333 GN=rplL PE=1 SV=2";
34	1	EColi	sp|P0A6Z6|NIKR_ECOLI	87	15176	5	5	3	3	1.27	"Nickel-responsive regulator OS=Escherichia coli (strain K12) OX=83333 GN=nikR PE=1 SV=1";
35	1	EColi	sp|P0ADK8|YIBL_ECOLI	85	13687	5	5	3	3	2.36	"Uncharacterized protein YibL OS=Escherichia coli (strain K12) OX=83333 GN=yibL PE=1 SV=1";
36	1	EColi	sp|P0A6U8|GLGA_ECOLI	83	52927	2	2	2	2	0.17	"Glycogen synthase OS=Escherichia coli (strain K12) OX=83333 GN=glgA PE=1 SV=1";
37	1	EColi	sp|P23836|PHOP_ECOLI	79	25519	3	3	2	2	0.39	"Transcriptional regulatory protein PhoP OS=Escherichia coli (strain K12) OX=83333 GN=phoP PE=1 SV=1"
38	1	EColi	sp|P0AF48|YJBQ_ECOLI	72	15692	5	5	2	2	1.22	"UPF0047 protein YjbQ OS=Escherichia coli (strain K12) OX=83333 GN=yjbQ PE=3 SV=1";
39	1	EColi	sp|P0AA43|RSUA_ECOLI	71	25941	4	4	3	3	0.62	"Ribosomal small subunit pseudouridine synthase A OS=Escherichia coli (strain K12) OX=83333 GN=rsuA PE=1 SV=1";
40	1	EColi	sp|P52076|QSEB_ECOLI	68	24708	4	4	2	2	0.4	"Transcriptional regulatory protein QseB OS=Escherichia coli (strain K12) OX=83333 GN=qseB PE=2 SV=1";
41	1	EColi	sp|P0AB43|YCGL_ECOLI	67	12452	2	2	2	2	0.94	"Protein YcgL OS=Escherichia coli (strain K12) OX=83333 GN=ycgL PE=1 SV=3";
42	1	EColi	sp|P37182|HYBD_ECOLI	39	17739	2	2	2	2	0.6	"Hydrogenase 2 maturation protease OS=Escherichia coli (strain K12) OX=83333 GN=hybD PE=1 SV=2";

## Sheet: AtNudt19
Search title,"Kufel cal";
MS data file	\\212.87.29.243\Dane\USERS\Agata\tmp\211234197kufe_Nudt27.mgf;
Database 1,"EColi (4,448 sequences;" 1	358	110 residues)"""
Database 2,"TAIR10 20101214 (35,386 sequences;" 14	482	855 residues)"""
Taxonomy 1	(none);
Taxonomy 2	(none);
Timestamp,"25 Nov 2022 at 15:14:29 GMT";
Type of search,"MS/MS Ion Search";
Quantitation	None;
Crosslinking	None;
Enzyme	Trypsin;
Fixed modifications,"Methylthio (C)";
Variable modifications,"Oxidation (M)";
Mass values	Monoisotopic;
Protein mass	Unrestricted;
Peptide mass tolerance,"5 ppm";
Fragment mass tolerance,"0.01 Da";
Max missed cleavages	1;
Instrument type	HCD;
Number of queries,"94,569";
;
;
Significance threshold p<	0.05;
Target FDR (overrides sig. threshold)	1;
Target FDR type	psm;
Max. number of families	AUTO;
Ions score or expect cut-off	-1;
Min. number of sig. unique sequences	2;
Preferred taxonomy,"All entries";
Show Percolator scores?	no;
Family	Member	Database	Accession	Score	Mass	Num. of matches	Num. of significant matches	Num. of sequences	Num. of significant sequences	emPAI	Description
1	1	TAIR10	AT5G20070.1	17193	48776	606	606	23	23	8.75	"ATNUDT19, ATNUDX19, NUDX19 | nudix hydrolase homolog 19 | chr5:6779893-6782308 FORWARD LENGTH=438";
2	1	EColi	sp|P0A6Y8|DNAK_ECOLI	789	69118	28	28	15	15	1.69	Chaperone protein DnaK OS=Escherichia coli (strain K12) OX=83333 GN=dnaK PE=1 SV=2;
3	1	EColi	sp|P0A850|TIG_ECOLI	233	48163	4	4	3	3	0.3	"Trigger factor OS=Escherichia coli (strain K12) OX=83333 GN=tig PE=1 SV=1";
4	1	EColi	sp|P0AFG3|ODO1_ECOLI	231	105455	5	5	4	4	0.18	2-oxoglutarate dehydrogenase E1 component OS=Escherichia coli (strain K12) OX=83333 GN=sucA PE=1 SV=1;
5	1	EColi	sp|P64588|YQJI_ECOLI	117	23754	3	3	2	2	0.43	"Transcriptional regulator YqjI OS=Escherichia coli (strain K12) OX=83333 GN=yqjI PE=1 SV=1";
6	1	EColi	sp|P37773|MPL_ECOLI	89	50210	6	6	2	2	0.19	UDP-N-acetylmuramate--L-alanyl-gamma-D-glutamyl-meso-2,6-diaminoheptandioate ligase OS=Escherichia coli (strain K12) OX=83333 GN=mpl PE=1 SV=3;
7	1	EColi	sp|P33602|NUOG_ECOLI	48	100972	2	2	2	2	0.09	NADH-quinone oxidoreductase subunit G OS=Escherichia coli (strain K12) OX=83333 GN=nuoG PE=1 SV=4;
8	1	EColi	tr|A0A7H2C767|A0A7H2C767_ECOLI	43	79913	2	2	2	2	0.11	Chaperone protein ClpB OS=Escherichia coli (strain K12) OX=83333 GN=clpB PE=3 SV=1;
